# Supplementary material for: Designing SnS/MoS2 van der Waals heterojunction for direct Z-scheme photocatalytic overall water-splitting by DFT investigation
Source: Royal Society of Chemistry journal article supplement (doi:10.1039/d2cp02692a), 2022-01-01
Supplement: d2cp02692a1.pdf [file d2cp02692a1.pdf]

## Supporting information

### Designing SnS/MoS<sub>2</sub> van der Waals heterojunction for direct Z-scheme photocatalytic overall water-splitting by DFT investigation

Xiaofang Jia,<sup>a</sup> Jinlong Wang,<sup>b</sup> Yue Lu,<sup>a</sup> Jiaming Sun,<sup>a</sup> Yang Li,<sup>a</sup> Yuyan Wang\*<sup>c</sup> and Junying Zhang\*<sup>a</sup>

<sup>a</sup> School of Physics, Beihang University, Beijing 100191, China.

E-mail: zjy@buaa.edu.cn;

<sup>b</sup> School of physics and Electronic Engineering, Xinxiang University, Xinxiang, 453003, China.

<sup>c</sup> Beijing National Research Center for Information Science and Technology, Tsinghua University, Beijing 100084, China.

E-mail: wangyuyan@tsinghua.edu.cn

Table S1 Lattice constants (Å) of MXs (M = Ge, Sn; X=S, Se, Te) after geometry relaxation.

| MXs  | Bulk |      |       | Monolayer |      |
|------|------|------|-------|-----------|------|
|      | a    | b    | c     | a         | b    |
| GeS  | 4.34 | 3.67 | 10.62 | 4.44      | 3.64 |
| GeSe | 4.45 | 3.85 | 10.99 | 4.27      | 3.93 |
| GeTe | 4.64 | 4.15 | 11.53 | 4.27      | 4.21 |
| SnS  | 4.30 | 4.00 | 11.34 | 4.11      | 4.07 |
| SnSe | 4.39 | 4.19 | 11.59 | 4.31      | 4.25 |
| SnTe | 4.72 | 4.43 | 12.07 | 4.51      | 4.50 |

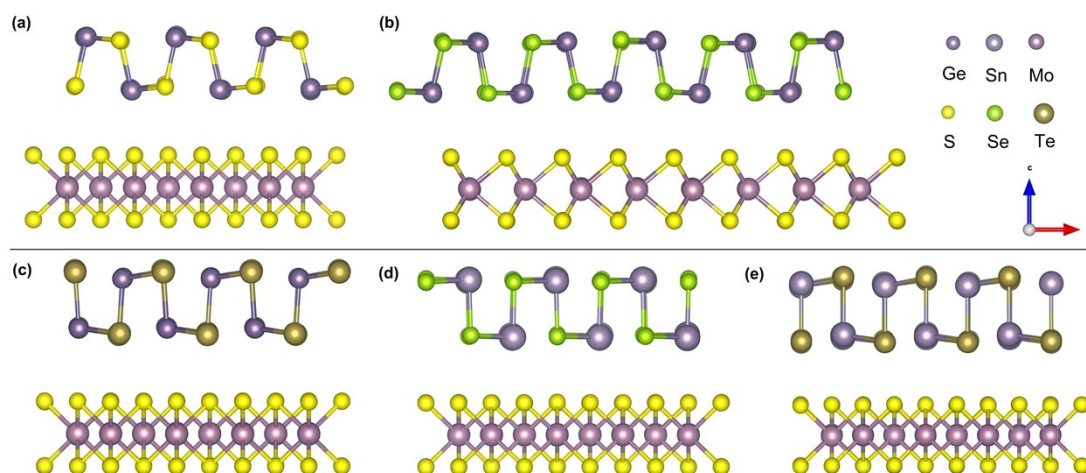

Fig. S1 Side view of (a) GeS/MoS<sub>2</sub>, (b) GeSe/MoS<sub>2</sub>, (c) GeTe/MoS<sub>2</sub>, (d) SnSe/MoS<sub>2</sub>, and (e) SnTe/MoS<sub>2</sub> heterojunctions.

### Part 1. Regulation of interfacial stacking patterns

In order to explore the effect of different stacking of atoms between layers on the system, six high-symmetry stacking patterns are considered by moving MXs in the direction a/b: M atom in MXs is equally positioned with Mo atom (S1), S atom (S2) and middle of Mo-S bond (S3), or two layers are arranged stochastically (S4), the rhombus ring in MXs stacks the middle of hexagonal ring in MoS<sub>2</sub>

(S5), the rhombus ring in MXs and hexagonal ring in MoS<sub>2</sub> stacks approximately matching (S6), respectively. The details are illustrated in the circle in Fig.S2. The results show that the effects of different interfacial stacking patterns on the binding energy of the heterojunction are small. The systems with lowest interface binding energy are selected as the most stable MXs/MoS<sub>2</sub> heterojunctions for subsequent research.

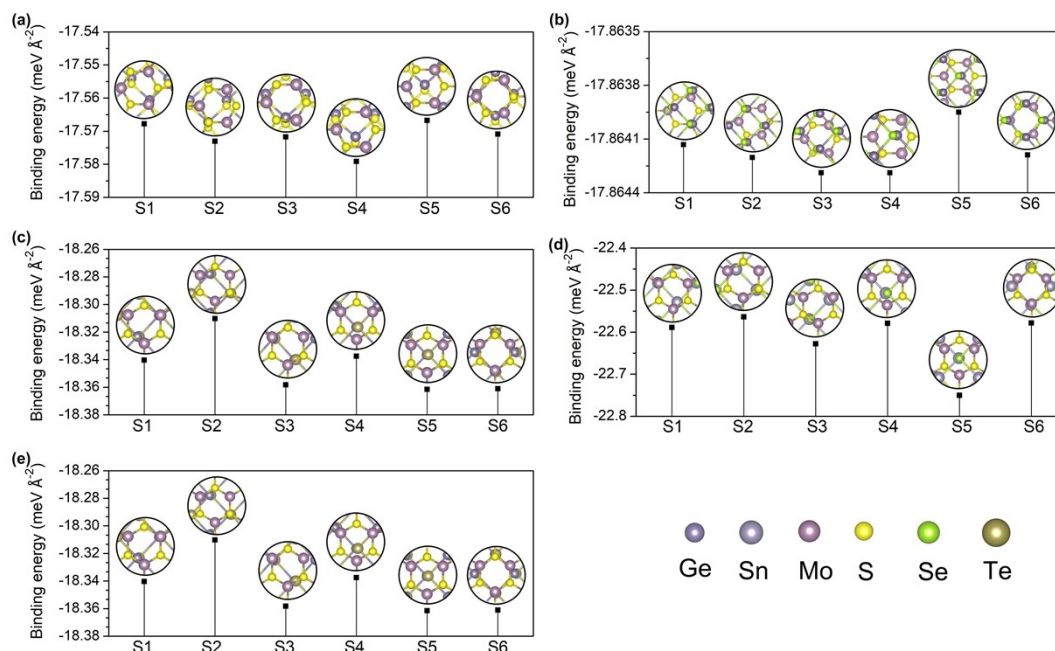

Fig. S2 Binding energies for the six high-symmetry stacking patterns (S1-S6) of (a) GeS/MoS<sub>2</sub>, (b) GeSe/MoS<sub>2</sub>, (c) GeTe/MoS<sub>2</sub>, (d) SnSe/MoS<sub>2</sub>, and (e) SnTe/MoS<sub>2</sub> heterojunctions.

Table S2 Detailed structural information of MXs (M = Ge, Sn; X=S, Se, Te)/MoS<sub>2</sub> vdW heterojunction systems

| Systems               | Supercell                                              | optimized lattice structural information (Å) | maximum lattice mismatches | interfacial binding energy (meV/Å <sup>2</sup> ) |
|-----------------------|--------------------------------------------------------|----------------------------------------------|----------------------------|--------------------------------------------------|
| GeS/MoS <sub>2</sub>  | GeS: 3 × 3<br>MoS <sub>2</sub> : 4 × 2√3               | a=11.00<br>b=13.03                           | a: 1.90 %<br>b: 0.66 %     | -17.58 (S4)                                      |
| GeSe/MoS <sub>2</sub> | GeSe: 5 × 4<br>MoS <sub>2</sub> : 5 × 4√3<br>(R = 90°) | a=22.15<br>b=15.98                           | a: 3.74 %<br>b: 1.75 %     | -17.86 (S4)                                      |
| GeTe/MoS <sub>2</sub> | GeTe: 3 × 4<br>MoS <sub>2</sub> : 4 × 3√3              | a=12.79<br>b=16.61                           | a: 0.21 %<br>b: 1.25 %     | -18.36 (S3)                                      |
| SnS/MoS <sub>2</sub>  | SnS: 3 × 4<br>MoS <sub>2</sub> : 4 × 3√3               | a=12.79<br>b=16.61                           | a: 3.81 %<br>b: 2.03 %     | -17.73 (S1)                                      |
| SnSe/MoS <sub>2</sub> | SnSe: 3 × 4<br>MoS <sub>2</sub> : 4 × 3√3              | a=12.80<br>b=16.69                           | a: 1.06 %<br>b: 2.33 %     | -22.61 (S5)                                      |
| SnTe/MoS <sub>2</sub> | SnTe: 3 × 5<br>MoS <sub>2</sub> : 4 × 4√3              | a=13.01<br>b=22.30                           | a: 2.00 %<br>b: 1.58 %     | -21.62 (S5)                                      |

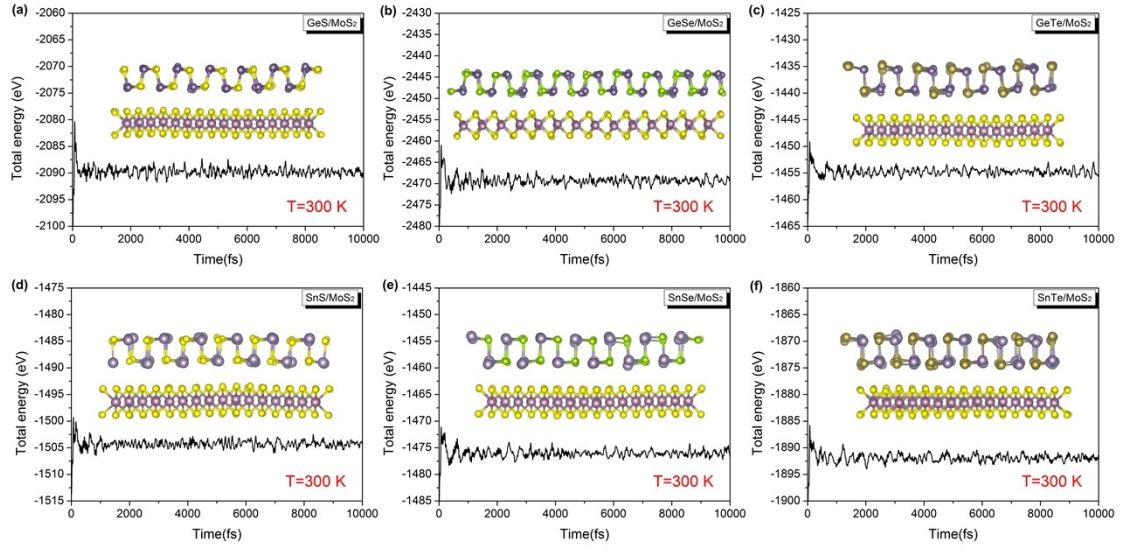

Fig. S3 Total energy fluctuations during AIMD simulations of (a) GeS/MoS<sub>2</sub>, (b) GeSe/MoS<sub>2</sub>, (c) GeTe/MoS<sub>2</sub>, (d) SnS/MoS<sub>2</sub>, (e) SnSe/MoS<sub>2</sub>, and (f) SnTe/MoS<sub>2</sub> heterojunctions. The insets show snapshots of the structures at 300 K at the end of the 10 ps AIMD simulation.

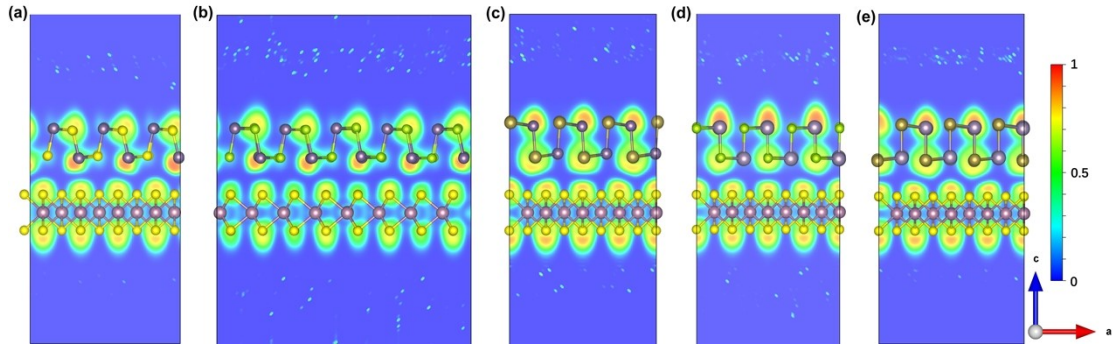

Fig. S4 ELFs of (a) GeS/MoS<sub>2</sub>, (b) GeSe/MoS<sub>2</sub>, (c) GeTe/MoS<sub>2</sub>, (d) SnSe/MoS<sub>2</sub>, and (e) SnTe/MoS<sub>2</sub> heterojunctions.

## Part 2. Interfacial charge-carrier transfer

The plane-integrated electron density difference is defined according to the following equation:

$$\Delta\rho = \rho_{MXs/MoS_2} - \rho_{MXs} - \rho_{MoS_2} \quad (1)$$

where  $\rho_{MXs/MoS_2}$ ,  $\rho_{MXs}$ , and  $\rho_{MoS_2}$  are the plane-averaged electron densities of MXs/MoS<sub>2</sub>, MXs and MoS<sub>2</sub>, respectively. The notable electron rearrangement localizes at the interface and this behavior is visually revealed in Fig. S5. The holes accumulate in the region close to the MXs layer, while the electrons accumulate in the region close to the MoS<sub>2</sub> layer.

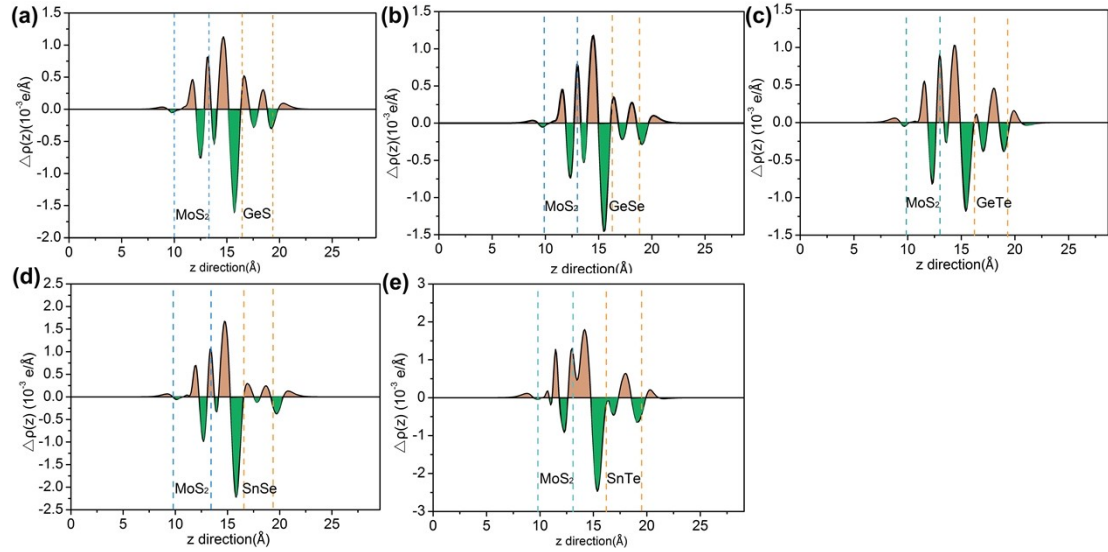

Fig. S5 Plane-integrated electron density differences along  $z$  direction for (a) GeS/MoS<sub>2</sub>, (b) GeSe/MoS<sub>2</sub>, (c) GeTe/MoS<sub>2</sub>, (d) SnSe/MoS<sub>2</sub>, and (e) SnTe/MoS<sub>2</sub> heterojunctions. The dusty pink and green regions represent electron accumulation and depletion, respectively.

### Part 3. Electronic structures of MXs/MoS<sub>2</sub>

To evaluate the potential of MXs/MoS<sub>2</sub> (M=Ge, Sn; X=S, Se, Te) vdW heterojunction as direct Z-scheme heterojunction, we investigate the electronic structure of MXs/MoS<sub>2</sub> vdW heterojunctions by PBE function (Fig. S6). The valence band is mainly contributed by nonmetal element X (X=S, Se, Te), and the conduction band is mainly contributed by metal element M (M=Ge, Sn). The band structures of GeS/MoS<sub>2</sub>, GeSe/MoS<sub>2</sub> and SnS/MoS<sub>2</sub> heterojunctions are shown in Figs. S 6a, b, and d. The density of states (DOSs) show that the valence band maximum (VBM) of GeS (GeSe or SnS) is lower than that of MoS<sub>2</sub>, while the conduction band minimum (CBM) is higher than MoS<sub>2</sub>. A typical Type- II alignment forms because of the apparent band gap caused by their interlaced VBM and CBM. However, the energy levels of GeTe/MoS<sub>2</sub>, SnSe/MoS<sub>2</sub> and SnTe/MoS<sub>2</sub> are approximately continuous and do not constitute Type- II alignment (Figs. S6c,e, and f), due to the apparent overlap of energy ranges between the VBM and the bottom of CBM. This is mainly due to the filling of Se and Te atoms with more extranuclear electrons than S, leading to the VBM moving to the direction of high energy. Moreover, Sn has more extranuclear electrons, which widens the energy level hybridization and moves the CBM downward.



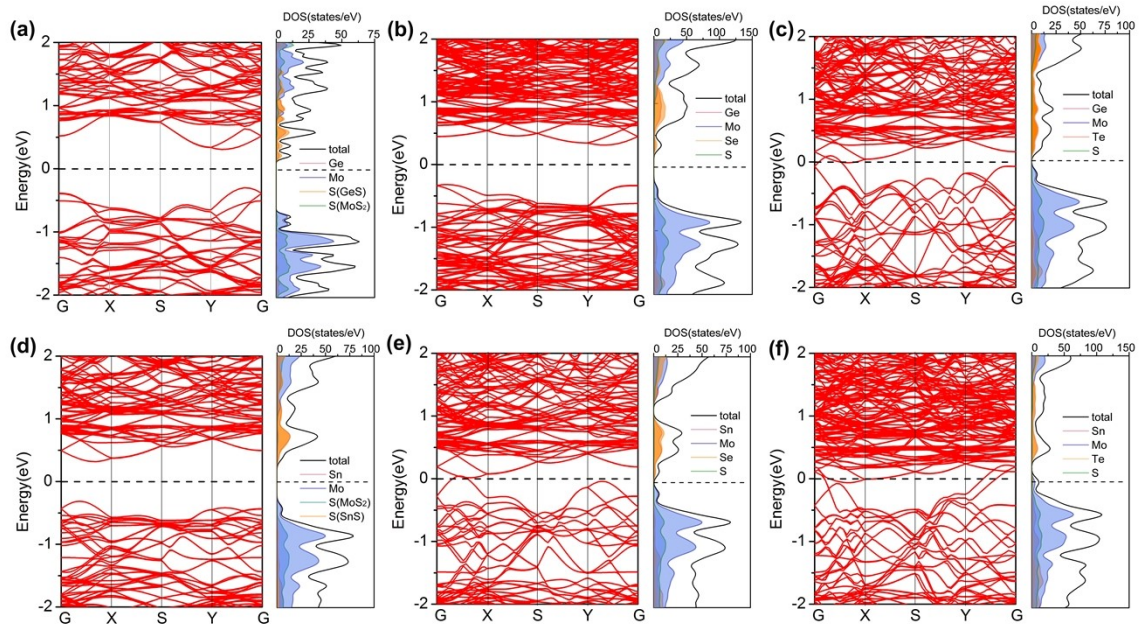

Fig. S6 Band structures and DOSs of (a) GeS/MoS<sub>2</sub>, (b) GeSe/MoS<sub>2</sub>, (c) GeTe/MoS<sub>2</sub>, (d) SnS/MoS<sub>2</sub>, (e) SnSe/MoS<sub>2</sub>, and (f) SnTe/MoS<sub>2</sub> heterojunctions calculated using PBE function. The orange and blue projective insets areas in DOSs represent the quantum states of MXs and MoS<sub>2</sub>, respectively.

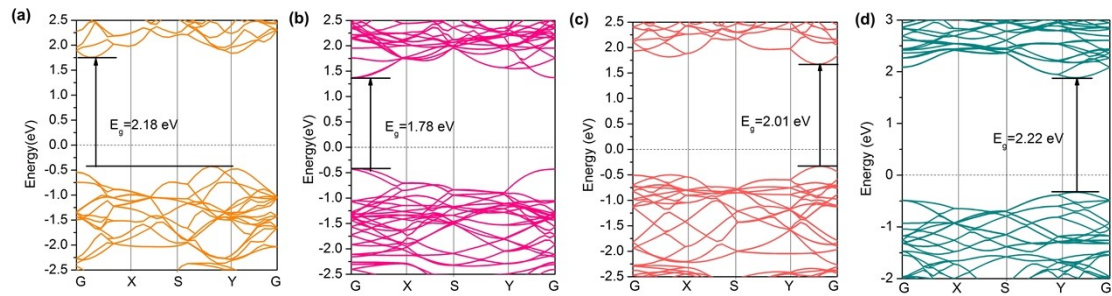

Fig. S7 Band structures of isolated (a) GeS, (b) GeSe, (c) SnS, and (d) MoS<sub>2</sub> monolayers calculated using HSE06.

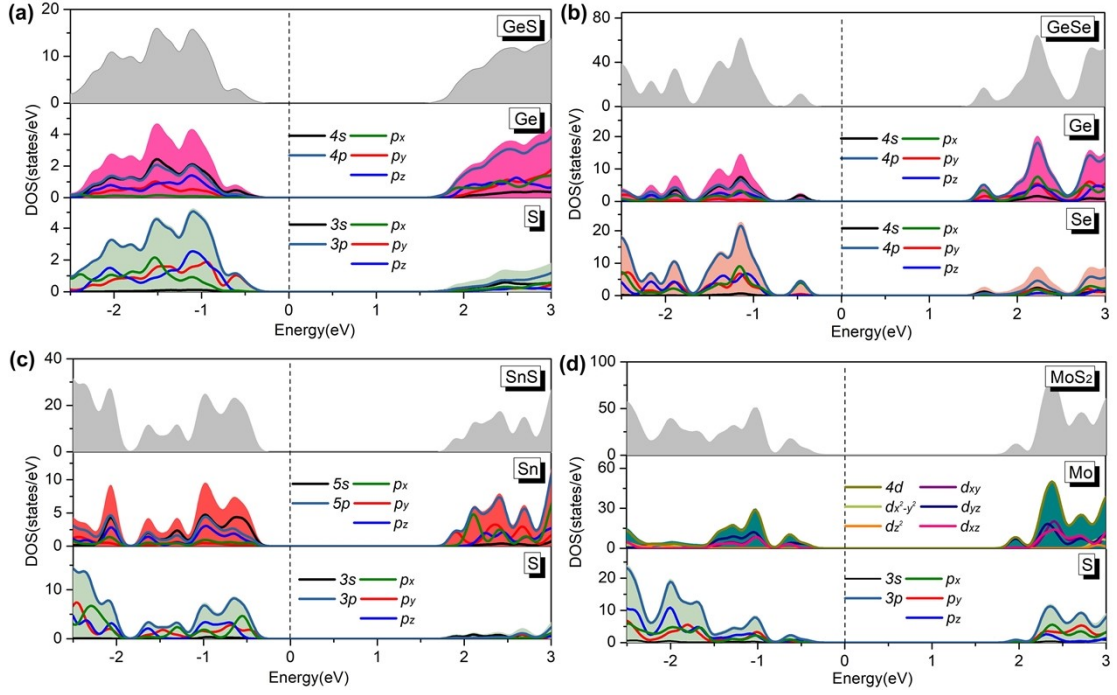

Fig. S8 Total and partial DOSs of isolated (a) GeS, (b) GeSe, (c) SnS, and (d) MoS<sub>2</sub> monolayers calculated using HSE06.

Table S3 Band gaps (eV) before ( $E_{g_1}$ ) and after forming heterojunction ( $E_{g_2}$ ), and the corresponding potential of VBM and CBM vs. vacuum energy level.

| System                                       | isolated layer |                  |                  | MXs/MoS <sub>2</sub> heterojunction |                  |                  |
|----------------------------------------------|----------------|------------------|------------------|-------------------------------------|------------------|------------------|
|                                              | $E_{g_1}$      | VBM <sub>1</sub> | CBM <sub>1</sub> | $E_{g_2}$                           | VBM <sub>2</sub> | CBM <sub>2</sub> |
| GeS                                          | 2.18           | -5.25            | -3.07            | 2.04                                | -5.42            | -3.38            |
| GeSe                                         | 1.78           | -5.03            | -3.25            | 1.74                                | -5.14            | -3.40            |
| SnS                                          | 2.01           | -5.06            | -3.05            | 1.99                                | -5.15            | -3.16            |
| MoS <sub>2</sub>                             | 2.22           | -6.11            | -3.89            | --                                  | --               | --               |
| MoS <sub>2</sub> (in GeS/MoS <sub>2</sub> )  | --             | --               | --               | 1.85                                | -6.40            | -4.55            |
| MoS <sub>2</sub> (in GeSe/MoS <sub>2</sub> ) | --             | --               | --               | 1.91                                | -6.23            | -4.32            |
| MoS <sub>2</sub> (in SnS/MoS <sub>2</sub> )  | --             | --               | --               | 1.88                                | -6.24            | -4.36            |

#### Part 4. Work function

The work function ( $\Phi$ ) is calculated using the following equation<sup>S1</sup>:

$$\Phi = E_{vac} - E_f \quad (2)$$

where  $E_{vac}$  represents the energy level of a stationary electron in the vacuum, which is nearby the material surface.  $E_f$  represents the Fermi level of the corresponding materials.

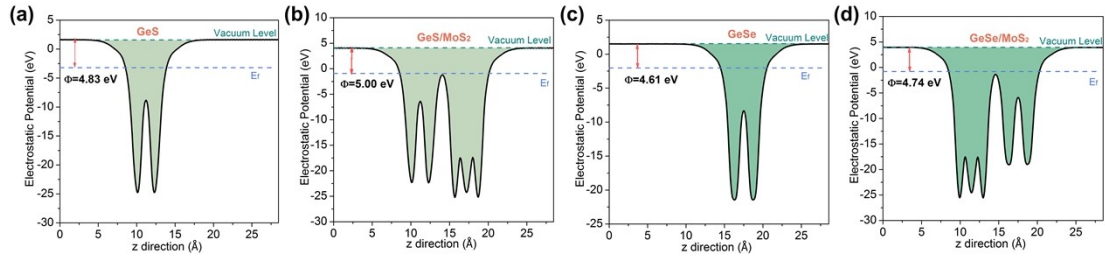

Fig. S9 Electrostatic potentials of (a) GeS monolayer, (b) GeS/MoS<sub>2</sub> heterojunction, (c) GeSe monolayer and (d) GeSe/MoS<sub>2</sub> heterojunction. The green and blue dashed lines represent the vacuum and Fermi levels, respectively.

Table S4 Formation energy of vacancy (eV) in GeS, GeSe, SnS and MoS<sub>2</sub>

| System                                     | GeS/MoS <sub>2</sub> | GeSe/MoS <sub>2</sub> | SnS/MoS <sub>2</sub> |
|--------------------------------------------|----------------------|-----------------------|----------------------|
| V <sub>Ge</sub>                            | 1.97                 | 1.64                  | --                   |
| V <sub>Sn</sub>                            | --                   | --                    | 1.67                 |
| V <sub>S</sub>                             | 2.14                 | --                    | 2.04                 |
| V <sub>Se</sub>                            | --                   | 2.29                  | --                   |
| V <sub>S</sub> on MoS <sub>2</sub> surface | 2.94                 | 2.81                  | 2.83                 |

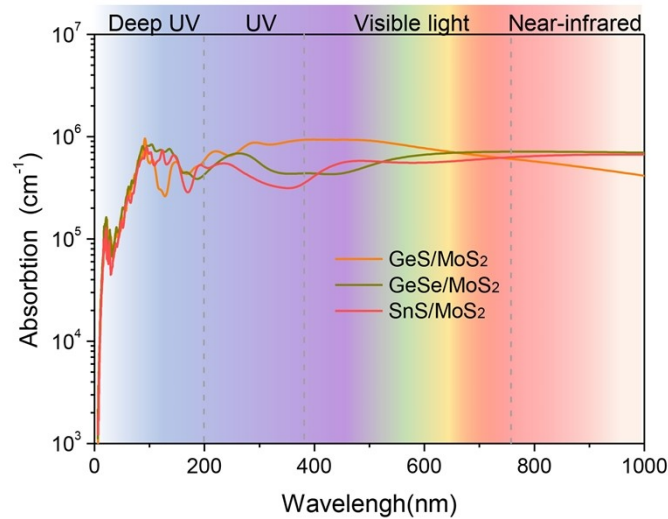

Fig. S10 Absorption spectra of GeS/MoS<sub>2</sub>, GeSe/MoS<sub>2</sub>, and SnS/MoS<sub>2</sub> heterojunctions by HSE06 method.

## Part 5. The absorption spectra of distorted GeS (GeSe or SnS) and MoS<sub>2</sub>

The direct Z-scheme requires the photoexcitation to proceed on the two monolayers separately.<sup>S2</sup> To reflect the photoelectron transition mechanism of two-step excitation in Fig. 5b. The absorption spectra of distorted GeS (GeSe or SnS) and MoS<sub>2</sub> monolayers are calculated separately to reflect the optical absorption of the heterojunction. Notably, distorted instead of pristine monolayer GeS (GeSe or SnS) and MoS<sub>2</sub> are used for the optical absorption calculation. In the heterojunctions, the geometrical configurations of the GeS (GeSe or SnS) and MoS<sub>2</sub> monolayers are distorted by interfacial vdW, in contrast to the pristine monolayers. In order to accurately reflect the absorption of the heterojunction by calculating the absorption spectrum of each layer,

we used the crystal structure of the distorted GeS (GeSe or SnS) and MoS<sub>2</sub> single layers, which were separated from GeS/MoS<sub>2</sub>, GeSe/MoS<sub>2</sub>, and SnS/MoS<sub>2</sub> heterojunction crystal structures after geometry optimization, respectively. Then, the optical properties of the as-obtained crystal structure are calculated by HSE06 to characterize the optical absorption of heterojunctions, as shown in Fig. 6. This is also an accepted means for DFT to characterize heterojunction absorption spectra, as reported previously.<sup>S3,S4</sup>

## Part 6. Activity of OER for SnS/MoS<sub>2</sub> heterojunctions surface

The OER for SnS/MoS<sub>2</sub> heterojunction on MoS<sub>2</sub> surface is studied. On MoS<sub>2</sub> surface of the SnS/MoS<sub>2</sub> heterojunction, H<sub>2</sub>O, \*OH, \*O, and \*OOH are considered. Based on the lower formation energy (Table S4), SnS/MoS<sub>2</sub> with S vacancy on MoS<sub>2</sub> surface is constructed for comparison. For intrinsic heterojunction, surface S atom is considered as active site. For the system containing S vacancy, two kinds of active sites are considered, including Mo suspension caused by S atom deletion and S atom which is the nearest neighbor to S vacancy. The  $\Delta G$  of OER is calculated in Fig. S11. Surface S atoms in pristine SnS/MoS<sub>2</sub> heterojunction do not have an advantage in OER reaction, because when  $U=1.23$  V (the theoretical lowest value of OER reaction voltage), an overpotential of about 2.46 eV is obtained, which means a considerable barrier to overcome (Fig. S11a). For the system with S vacancy on the surface, the next-nearest-neighboring S atom does not lower the barrier (Fig. S11b). The Mo suspension caused by the loss of S atom has a too strong adsorption capacity for intermediate species \*OH, \*O. However, when \*OOH is adsorbed, three neighboring Mo suspensions compete with each other and totally break the O-O bond in \*OOH (Fig. S11c). The reason for the \*OOH dissociation is that the strong electronegativity difference between Mo suspensions and O atom break the O-O covalent bond in \*OOH intermediates. In conclusion, the surface of pristine MoS<sub>2</sub>, whether or not it contains S vacancies, does not provide active sites for OER. Therefore, the catalytic OER activity of pristine MoS<sub>2</sub> is limited by the inert plane, and the activity needs to be further improved.

The feasible morphology modulation is of great significance for improving the catalytic activity of OER. Previous study found that the local change of Mo:S ratio of the precursor influenced the growth dynamics of the MoS<sub>2</sub> crystal, and led to the geometric shape change of MoS<sub>2</sub> between triangle and hexagon. The boundary atom arrangement of MoS<sub>2</sub> with different morphologies is also different, and the most common is the end of S or Mo atom as the edge.<sup>S5</sup> In this work, MoS<sub>2</sub> nanobelt with different edges of S and Mo atoms are constructed to explore their activation ability for OER reaction. The optimized most energetically favorable adsorbed intermediates of OER for MoS<sub>2</sub>-Mo-edge nanobelt shows that Mo suspension bond causes O-O in intermediate species \*OOH to break and dissociate (Fig. S11d). On the contrary, the \*OOH dissociation phenomenon does not occur at the S edges of MoS<sub>2</sub>, indicating that the S edges can be used as the active sites for OER reaction. As shown in Fig. S11e, when  $U=1.23$  V, its overpotential is only 1.13 eV. This is also consistent with the report that MoS<sub>2</sub> quantum dots with abundant boundary can achieve efficient OER activation.<sup>S6</sup>



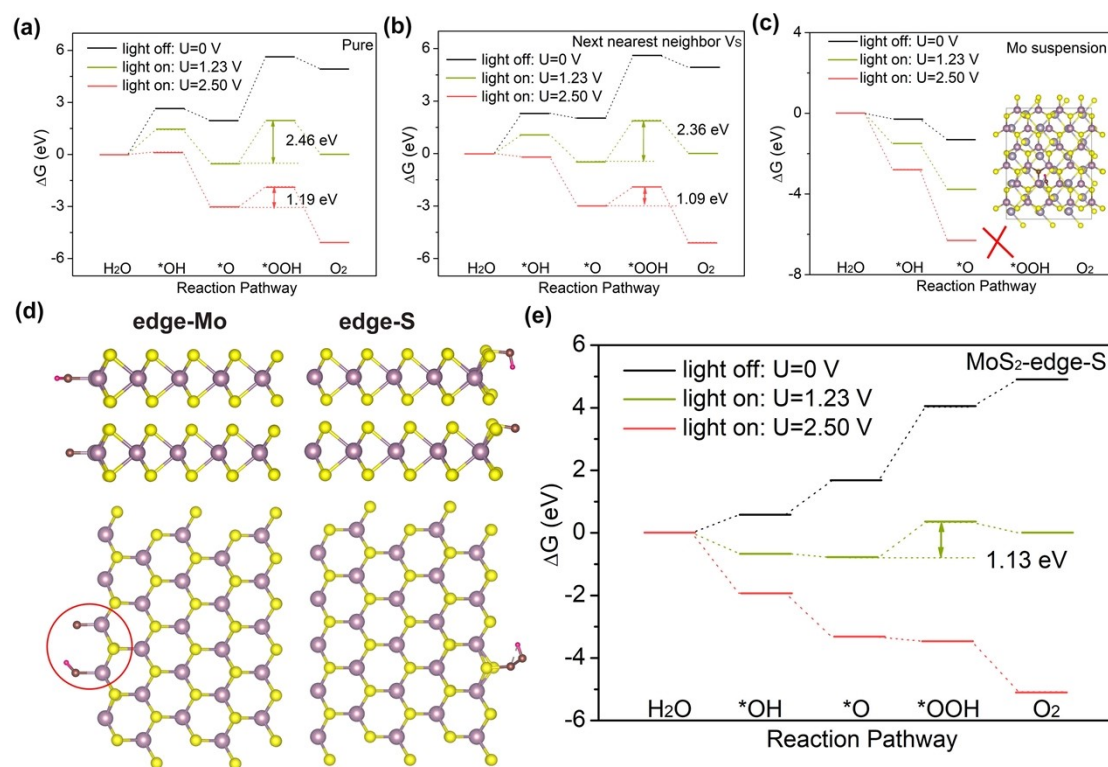

Fig. S11 Calculated  $\Delta G$  of the OER of SnS/MoS<sub>2</sub> heterojunction on (a) pure MoS<sub>2</sub> surface, (b) S atom next-nearest-neighboring S vacancy and (c) Mo suspension caused by S atom deletion. (d) Optimized most energetically favorable adsorbed intermediates (OH\*, O\*, OOH\*) of MoS<sub>2</sub> nanobelt models. (e) Calculated  $\Delta G$  of the OER of MoS<sub>2</sub> edge-S.

## References

- S1 C. X. Xia, J. Du, X. W. Huang, W. B. Xiao, W. Q. Xiong, T. X. Wang, Z. M. Wei, Y. Jia, J. J. Shi and J. B. Li. *Phys Rev B*, 2018, **97**, 115416.
- S2 Z. Wang, C. Li and K. Domen. *Chem. Soc. Rev.*, 2019, **48**, 2109.
- S3 Q. Yin, C. Yang, M. Wang and X. Ma. *J. Mater. Chem. C*, 2021, **9**, 12231.
- S4 L. Ju, Y. Dai, Wei Wei, M. Li and B. Huang. *Appl. Surf. Sci.*, 2018, **434**, 365–374.
- S5 S. Wang, Y. Rong, Y. Fan, M. Pacios, H. Bhaskaran, K. He and J.H. Warner. *Chemistry of Materials*, 2014, **26**, 6371-6379.
- S6 B. Mohanty, M. Ghorbani-Asl, S. Kretschmer, A. Ghosh, P. Guha, S. K. Panda, B. Jena, A. V. Krasheninnikov and B. K. Jena. *ACS Catal.*, 2018, **8**, 1683-1689.
